# Supplementary material
Source: publisher figshare collection journal article supplement (https://karger.figshare.com/ndownloader/files/19006880)
Supplement: Supplementary file 1 [file 19006880]

**Table 1**

*CARE Guideline for Case Reports (CARE Checklist, 2013; adapted to Blended Psychotherapy)*

| <b>Case Report Topic</b> | <b>CARE- ItemNo</b> | <b>Short Description</b>                                                                                       | <b>Reported</b>                                                                                         |
|--------------------------|---------------------|----------------------------------------------------------------------------------------------------------------|---------------------------------------------------------------------------------------------------------|
| Title                    | 1                   | Case Report, issues of prime interest                                                                          | ✓ Title page                                                                                            |
| Keywords                 | 2                   | 2-5 Keywords                                                                                                   | ✓ Title page                                                                                            |
| Summary                  | 3a                  | Characteristics of the case, goals                                                                             | ✓ Abstract                                                                                              |
|                          | 3b                  | Main symptoms and clinical findings                                                                            | ✓ Abstract                                                                                              |
|                          | 3c                  | Diagnoses, interventions, results                                                                              | ✓ Abstract                                                                                              |
|                          | 3d                  | Conclusion - quintessence                                                                                      | ✓ Abstract                                                                                              |
| Introduction             | 4                   | Overview background of treatment and case, state of research, relevant literature, goals and research question | ✓ Background                                                                                            |
|                          | 9a/b                | General description of the intervention (type/delivery) and basic conditions                                   | ✓ Description of the Treatment Elements of the bPT                                                      |
|                          | -                   | Procedure for writing the case report                                                                          | ✓ Method                                                                                                |
| IC                       | 13                  | Informed Consent                                                                                               | ✓ Method                                                                                                |
|                          |                     |                                                                                                                | ✓ Case Report                                                                                           |
| Patient information      | 5a                  | Demographic characteristics (e.g. age, gender, occupation, family status)                                      | <u>Sources/Measures:</u><br>Demographics (T0)                                                           |
|                          | 5b                  | Main symptoms/complaints                                                                                       | MINI (T0), clinical findings (T0), PHQ-9 (T0)                                                           |
|                          | 5c                  | Anamnesis, comorbidities                                                                                       | Tic-P (T0), patient survey and general practitioner survey (T0)                                         |
|                          | 5d                  | Previous and current treatments and their results                                                              | Tic-P (T0), GP survey (T0)                                                                              |
|                          | -                   | Treatment expectations, preferences                                                                            | CEQ (T0), patient survey (T0), clinical judgment                                                        |
| Clinial findings         | 8d                  | Prognosis, reasons for participation                                                                           | GP survey (T0)                                                                                          |
| Timeline                 | 6                   | Relevant findings of the somatic examination                                                                   |                                                                                                         |
| Diagnostic procedure     | 7                   | Important time points and courses of the treatment case with regard to diagnosis, interventions and results    | MINI (T0, T3), PHQ-9 (all), GP survey (T0, T1), EMA, Tic-P (T0,1,2,3), therapy management, therapy file |
|                          | 8a                  | Diagnostic methods                                                                                             | Clinical structured interviews, psychometric assessments, test findings                                 |
|                          | 8b/c                | Diagnostic considerations and diagnostic challenges                                                            |                                                                                                         |
| Therapeutic intervention | 9a                  | Type of intervention                                                                                           | Therapy file, therapist survey                                                                          |
|                          | 9b                  | Delivery of the intervention (course of treatment, chronogram)                                                 | therapy management, therapy file, log files, video analysis, EMA                                        |
|                          | 9c                  | Changes of intervention and notable occurrences                                                                | Therapy management                                                                                      |

Table 1 (continued):

*CARE Guideline for Case Reports (CARE Checklist, 2013; adapted to Blended Psychotherapy)*

| <b>Case Report Topic</b> | <b>CARE- ItemNo</b> | <b>Short Description</b>                                     | <b>Reported</b>                                                               |
|--------------------------|---------------------|--------------------------------------------------------------|-------------------------------------------------------------------------------|
|                          |                     |                                                              | ✓ Case report                                                                 |
| Outcomes and Follow-up   | 10c                 | Adherence of the intervention use                            | Therapy management                                                            |
|                          | 10a, 12             | Patient and physician judged results and treatment courses   | PHQ9 (T1, T2, T3), EMA, PSTB/TSTB, treatment finding (T1), GP survey (T1)     |
|                          | 10b                 | Important findings of the follow-up checks                   | WAI (T1), TAI (T1), CSQ (T1), SUS (T1), MINI (T3), GP survey (T1), Tic-P (T1) |
|                          | 10d                 | Unwanted and unexpected events                               | INEP (T3)                                                                     |
|                          | 10a                 | Catamnesis and clinical significance of results              | RCI (PHQ-9), life events, patient survey (T3)                                 |
| Patient perspective      | 12                  | Did the patient communicate the own opinion and experiences? | patient survey (T1)                                                           |
| Discussion               | 11d                 | Quintessence of the case report (results)                    | ✓ Conclusion                                                                  |
|                          | 11a                 | Strengths and weaknesses of patient care                     | ✓ Conclusion                                                                  |
|                          | 11b                 | Discussion of relevant literature                            | ✓ Conclusion                                                                  |
|                          | -                   | Discussion of the limitations of the case report             | ✓ Conclusion                                                                  |
|                          | 11c                 | Conclusion and implications for the future                   | ✓ Conclusion                                                                  |

Note. All item numbers of the CARE checklist (2013), which were included in the case report, are written down in the column Item no. Link to original CARE checklist: <http://www.care-statement.org/>.

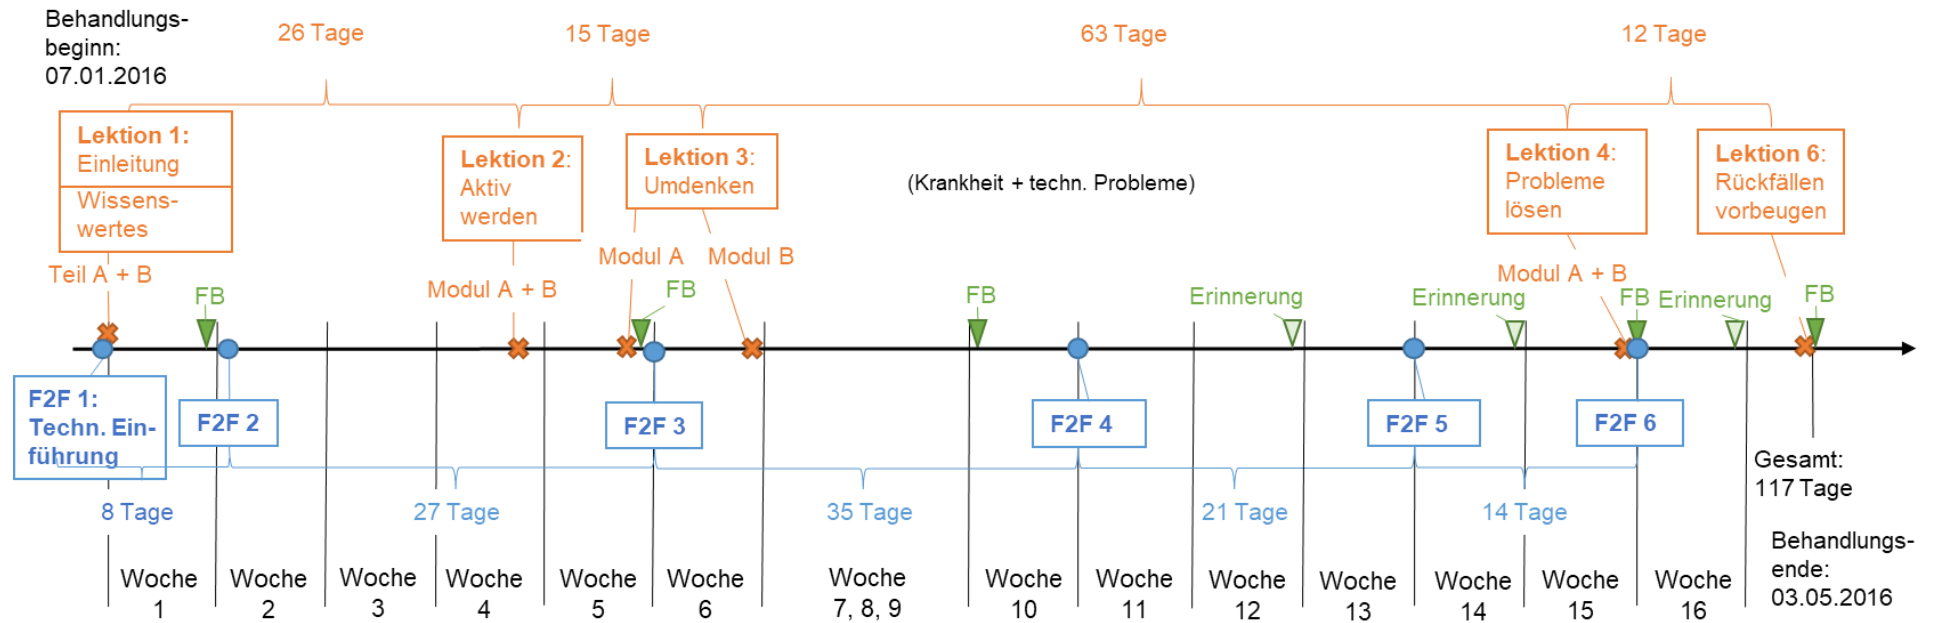

Figure 1. Timeline of Ms. Mai's treatment. This timeline shows the treatment course with regard to the time points of online lessons, face-to-face sessions, feedback and reminding mailings.

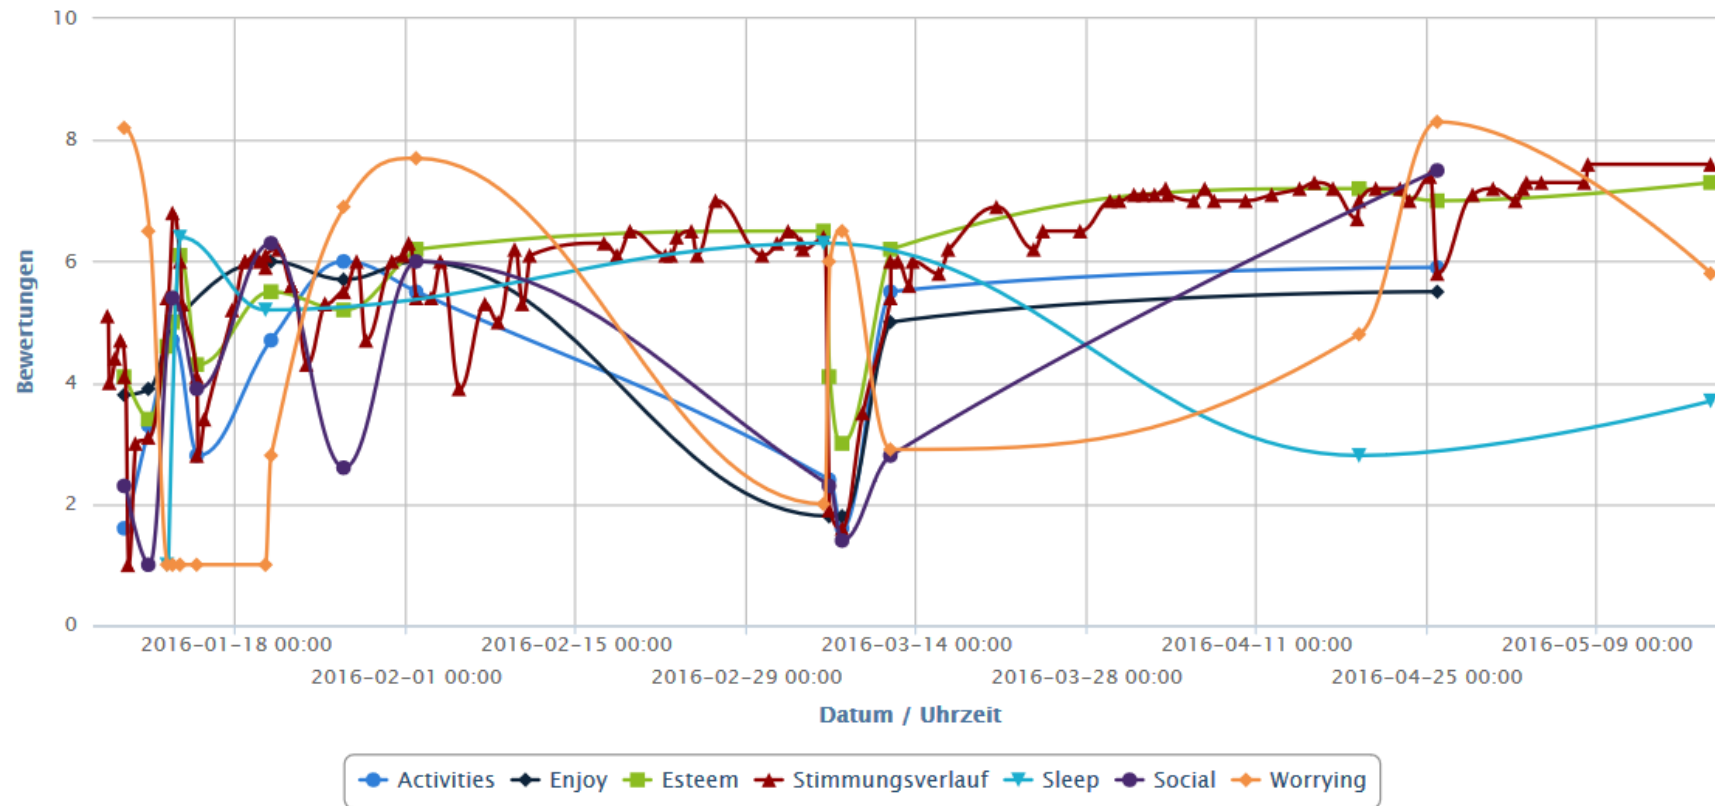

Figure 2. App-based measurements of progress (EMA data: activities, Enjoy, Esteem, Mood, Sleep, Social activities, Worrying) of Ms. Mai during the intervention.
